# Supplementary material for: Guest-Mediated Reversal of the Tumbling Process in Phosphorus-Dendritic Compounds Containing β-Cyclodextrin Units: An NMR Study
Source: MDPI journal article supplement (doi:10.3390/ph14060556), 2021-06-11
Supplement: s1 [file s1]

# *Supplementary Information*

Kendra Sorroza-Martínez <sup>1</sup>, Israel González-Méndez <sup>1,\*</sup>, Mireille Vonlanthen <sup>1</sup>, Fabián Cuétara-Guadarrama <sup>1</sup>, Javier Illescas <sup>2</sup>, Xiao Xia Zhu <sup>3</sup> and Ernesto Rivera <sup>1,\*</sup>

## Analysis data of

- Figure S1.** DEPTQ-NMR spectrum of P<sub>3</sub>N<sub>3</sub>-[O-C<sub>6</sub>H<sub>4</sub>-O-(CH<sub>2</sub>)<sub>3</sub>-βCD]<sub>6</sub> (**I**) in D<sub>2</sub>O. p2
- Figure S2.** 2D NMR COSY spectrum of P<sub>3</sub>N<sub>3</sub>-[O-C<sub>6</sub>H<sub>4</sub>-O-(CH<sub>2</sub>)<sub>3</sub>-βCD]<sub>6</sub> (**I**) in D<sub>2</sub>O. p3
- Figure S3.** <sup>1</sup>H NMR spectrum of P<sub>3</sub>N<sub>3</sub>-[O-C<sub>6</sub>H<sub>4</sub>-O-(CH<sub>2</sub>)<sub>4</sub>-βCD]<sub>6</sub> (**II**) in D<sub>2</sub>O. p4
- Figure S4.** DEPTQ-NMR spectrum of P<sub>3</sub>N<sub>3</sub>-[O-C<sub>6</sub>H<sub>4</sub>-O-(CH<sub>2</sub>)<sub>4</sub>-βCD]<sub>6</sub> (**II**) in D<sub>2</sub>O. p5
- Figure S5.** 2D NMR HMQC spectrum of P<sub>3</sub>N<sub>3</sub>-[O-C<sub>6</sub>H<sub>4</sub>-O-(CH<sub>2</sub>)<sub>4</sub>-βCD]<sub>6</sub> (**II**) in D<sub>2</sub>O. p6
- Figure S6.** 2D NMR NOESY spectrum of P<sub>3</sub>N<sub>3</sub>-[O-C<sub>6</sub>H<sub>4</sub>-O-(CH<sub>2</sub>)<sub>4</sub>-βCD]<sub>6</sub> (**II**) in D<sub>2</sub>O. p7
- Figure S7.** 2D NMR COSY spectrum of P<sub>3</sub>N<sub>3</sub>-[O-C<sub>6</sub>H<sub>4</sub>-O-(CH<sub>2</sub>)<sub>4</sub>-βCD]<sub>6</sub> (**II**) in D<sub>2</sub>O. p8
- Figure S8.** <sup>1</sup>H-NMR titration experiment of dendritic compound (**II**). p9
- Figure S9.** Job plot for the inclusion complex of AdCOOH with βCD cavities in the dendritic compound (**II**). p10
- Figure S10.** <sup>1</sup>H NMR spectrum of inclusion complex P<sub>3</sub>N<sub>3</sub>-[O-C<sub>6</sub>H<sub>4</sub>-O-(CH<sub>2</sub>)<sub>4</sub>-βCD]<sub>6</sub> (**II**)/AdCOOH in D<sub>2</sub>O. p11
- Figure S11.** 2D NMR NOESY spectrum of inclusion complex P<sub>3</sub>N<sub>3</sub>-[O-C<sub>6</sub>H<sub>4</sub>-O-(CH<sub>2</sub>)<sub>4</sub>-βCD]<sub>6</sub> (**II**)/AdCOOH in D<sub>2</sub>O. p12

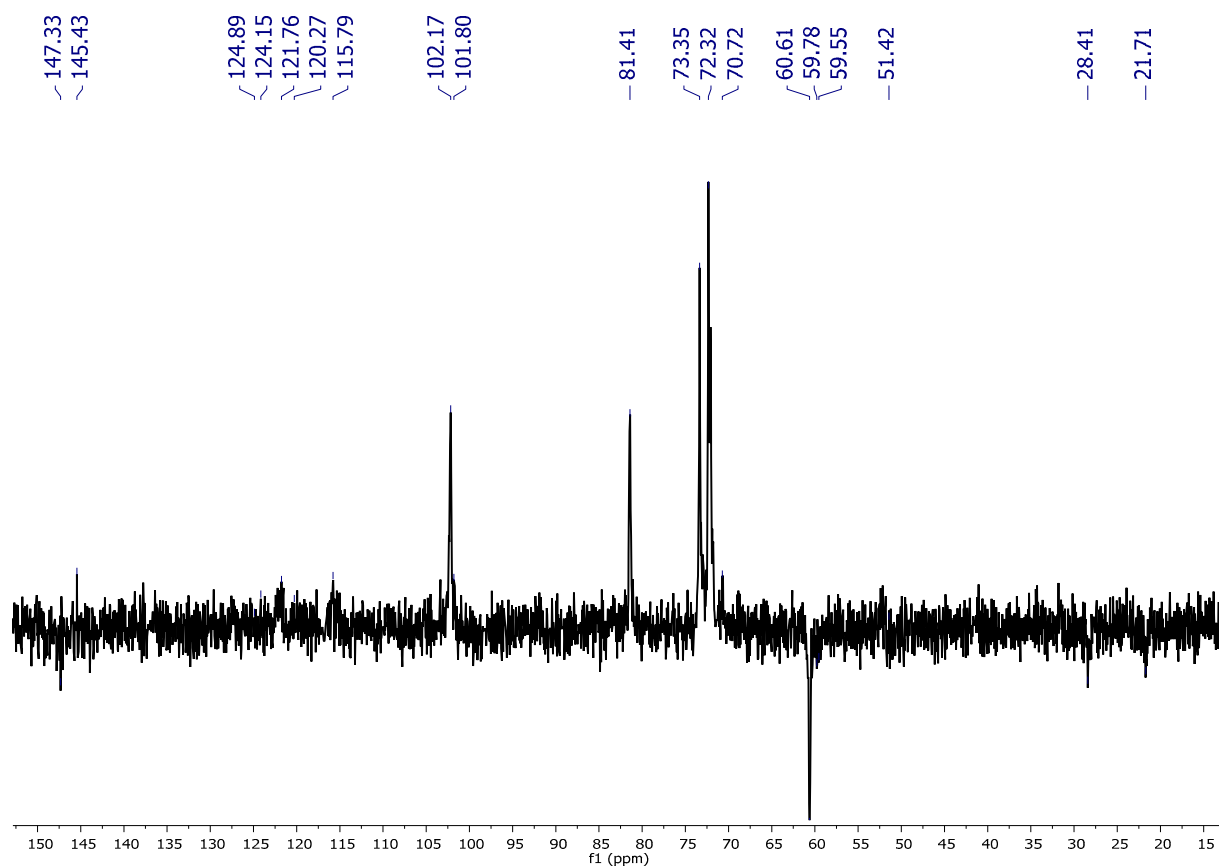

**Figure S1.** DEPTQ-NMR spectrum of  $P_3N_3-[O-C_6H_4-O-(CH_2)_3-\beta CD]_6$  (I) in  $D_2O$ .

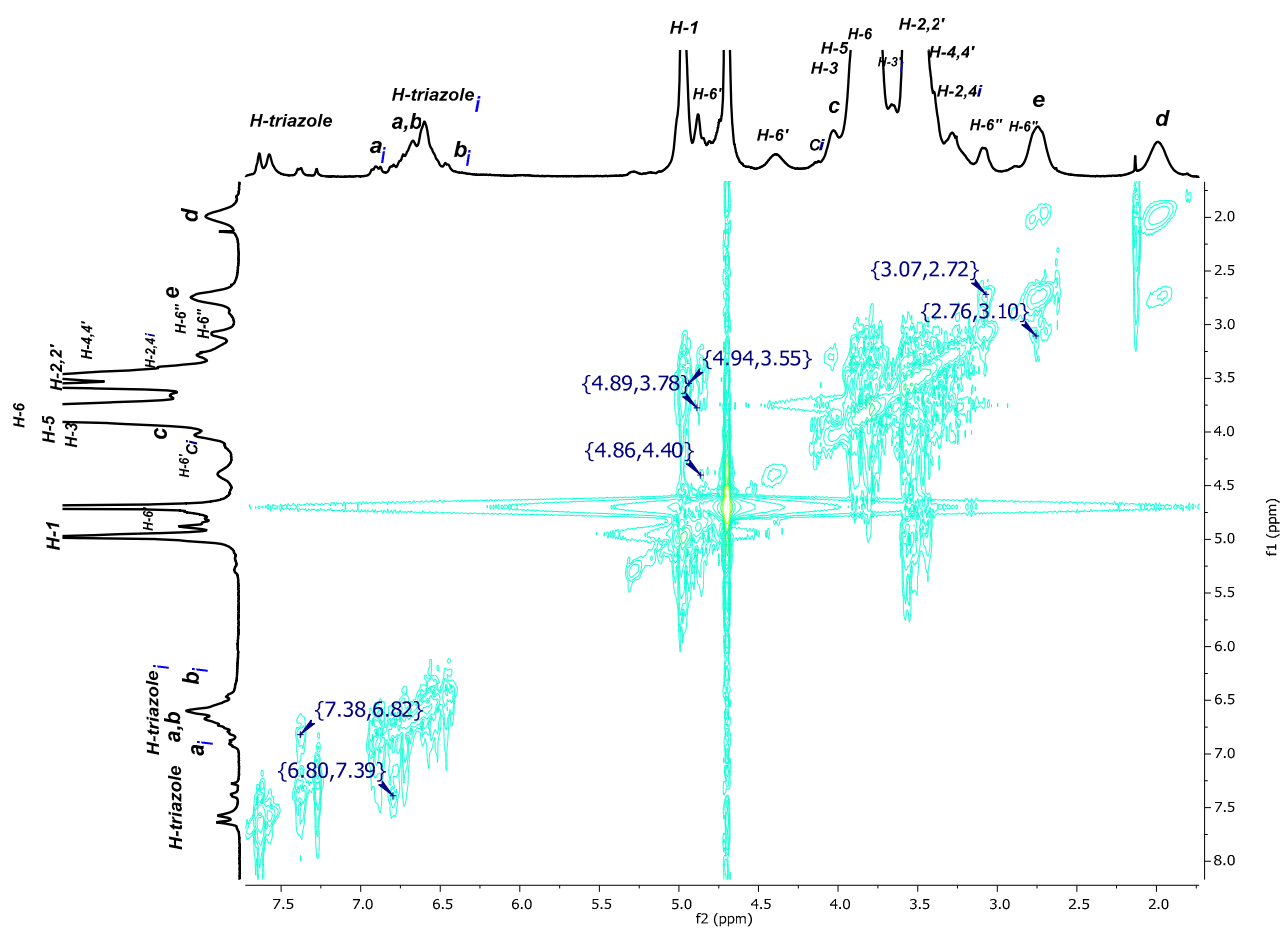

**Figure S2.** 2D NMR COSY spectrum of  $\text{P}_3\text{N}_3\text{-[O-C}_6\text{H}_4\text{-O-(CH}_2\text{)}_3\text{-}\beta\text{CD]}_6$  (**I**) in  $\text{D}_2\text{O}$ .

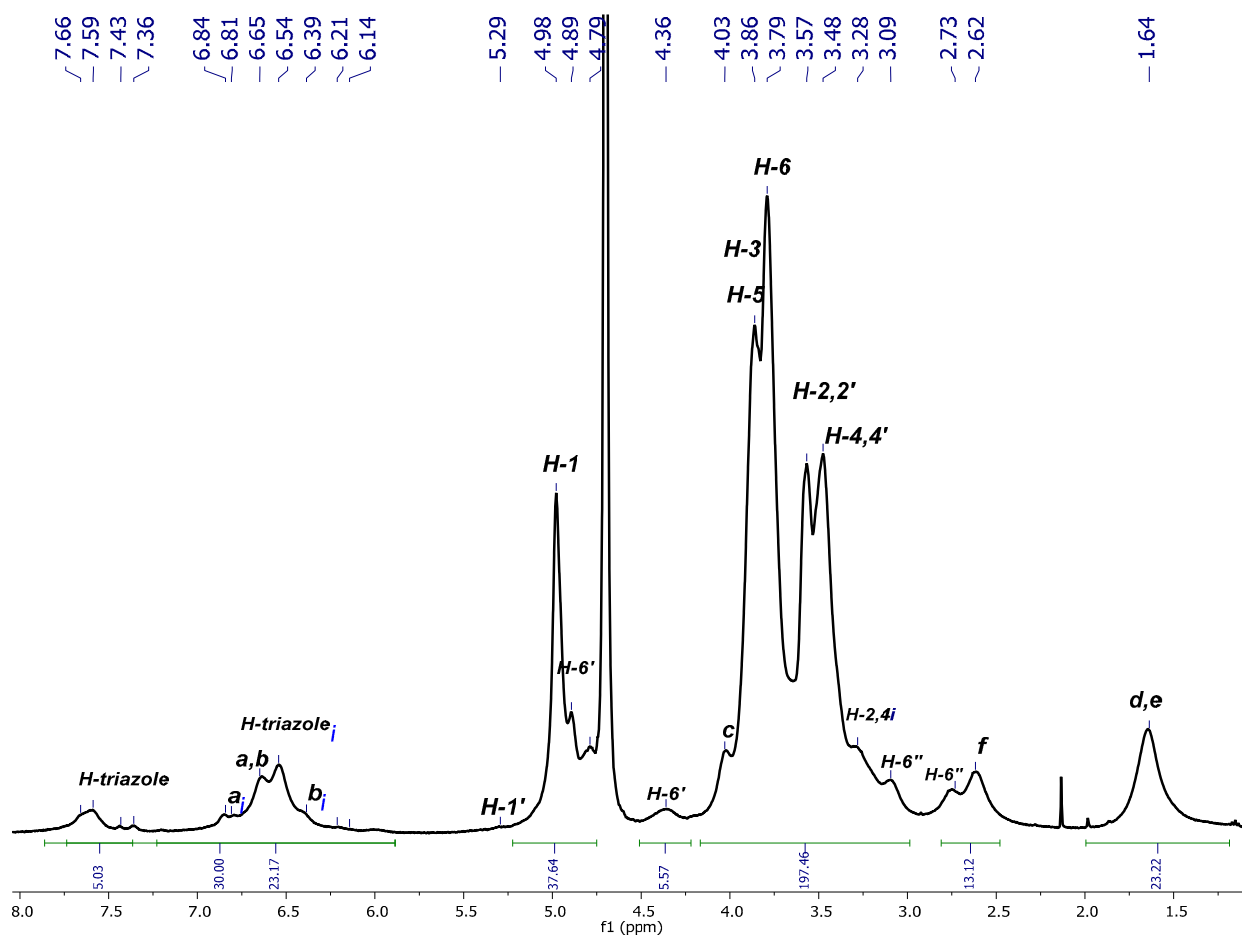

**Figure S3.**  $^1\text{H}$  NMR spectrum of  $\text{P}_3\text{N}_3\text{-[O-C}_6\text{H}_4\text{-O-(CH}_2\text{)}_4\text{-}\beta\text{CD]}_6$  (II) in  $\text{D}_2\text{O}$ .

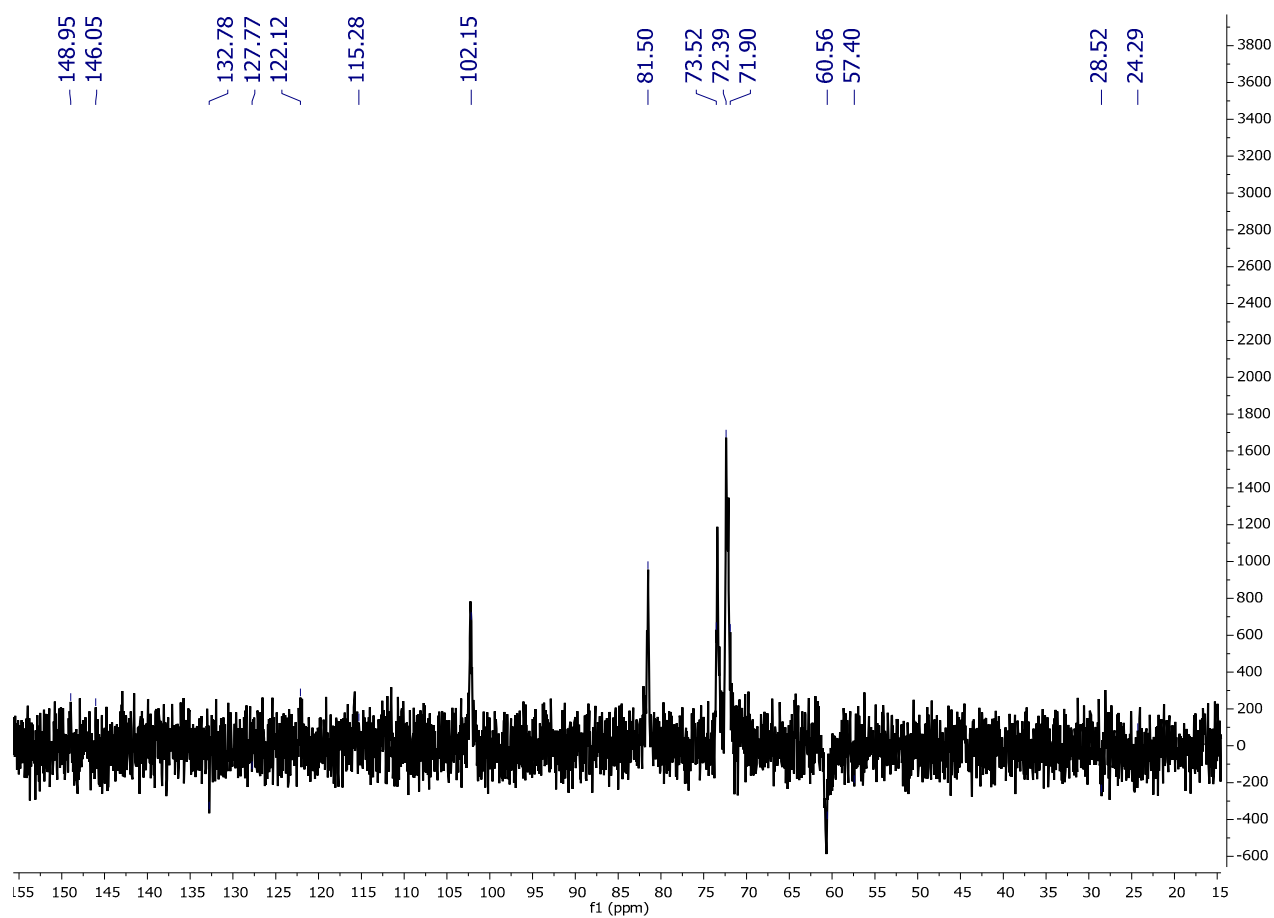

**Figure S4.** DEPTQ-NMR spectrum of  $P_3N_3-[O-C_6H_4-O-(CH_2)_4-\beta CD]_6$  (II) in  $D_2O$ .

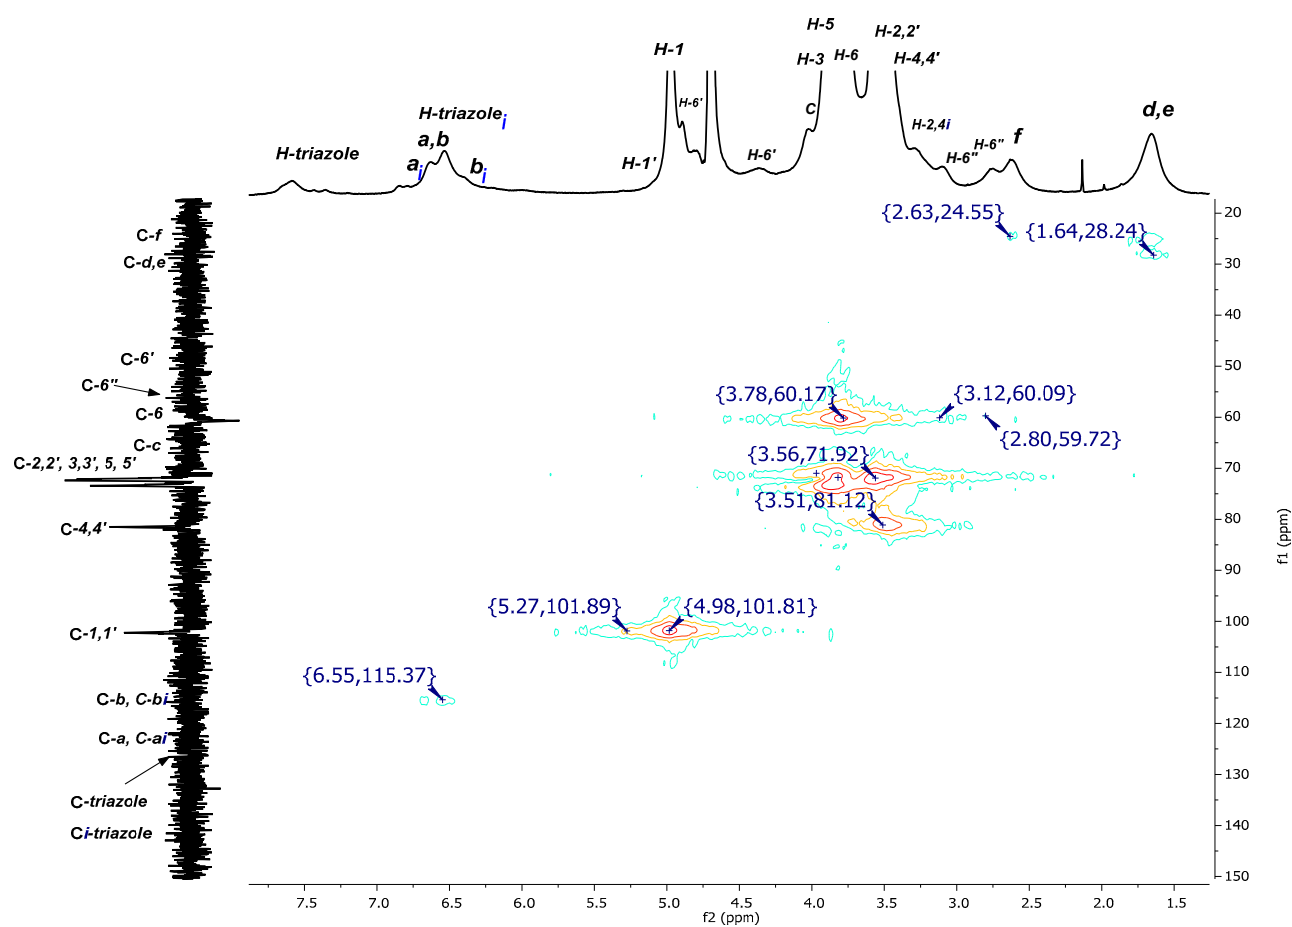

Figure S5. 2D NMR HMQC spectrum of  $P_3N_3-[O-C_6H_4-O-(CH_2)_4-\beta CD]_6$  (II) in  $D_2O$ .

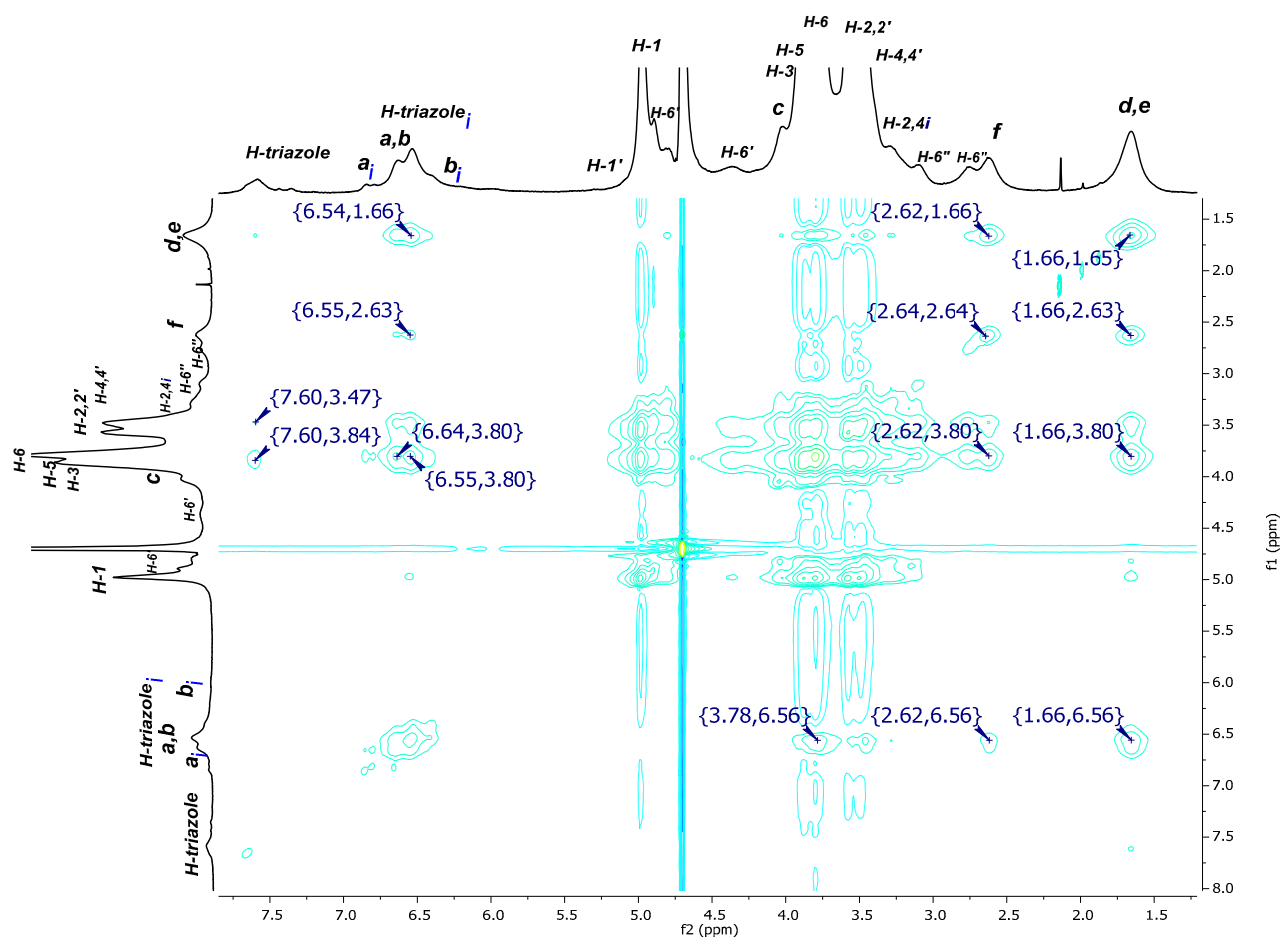

**Figure S6.** 2D NMR NOESY spectrum of  $\text{P}_3\text{N}_3\text{-[O-C}_6\text{H}_4\text{-O-(CH}_2\text{)}_4\text{-}\beta\text{CD]}_6$  (**II**) in  $\text{D}_2\text{O}$ .

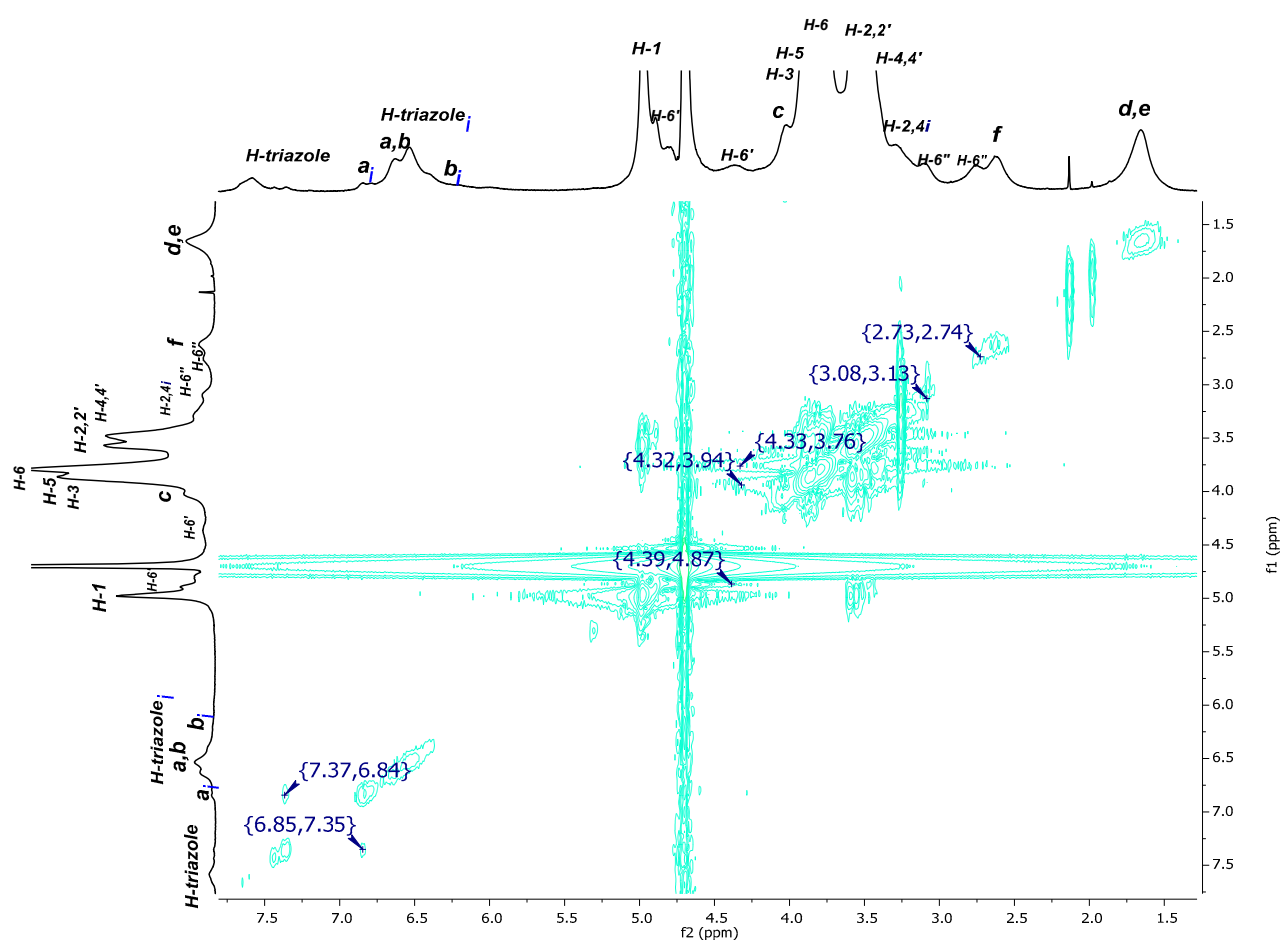

**Figure S7.** 2D NMR COSY spectrum of  $P_3N_3$ -[O-C<sub>6</sub>H<sub>4</sub>-O-(CH<sub>2</sub>)<sub>4</sub>-βCD]<sub>6</sub> (II) in D<sub>2</sub>O.



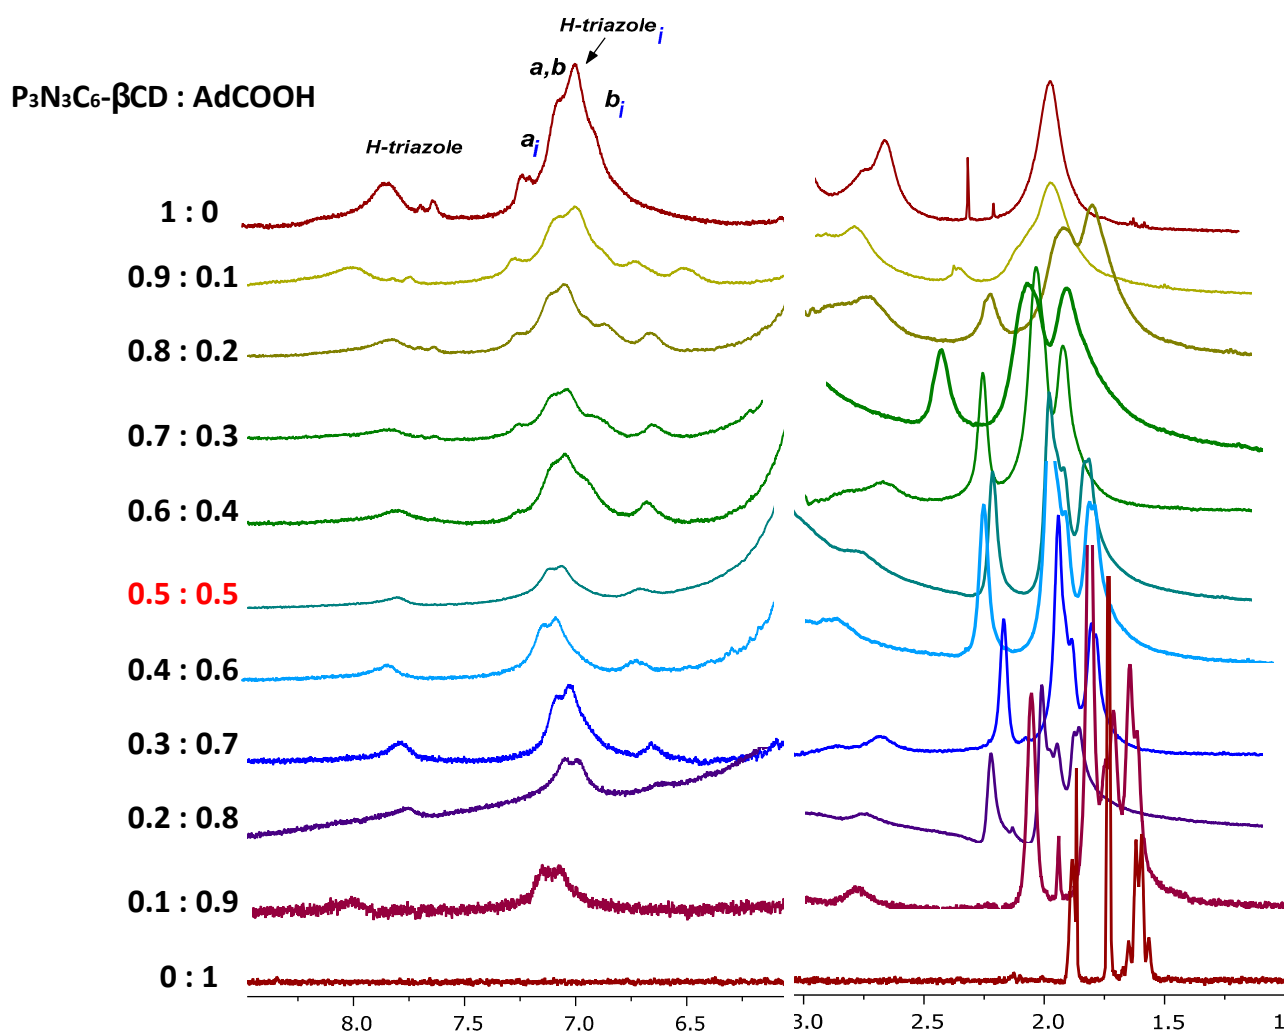

Figure S8.  $^1\text{H}$ -NMR titration experiment of dendritic compound (II).

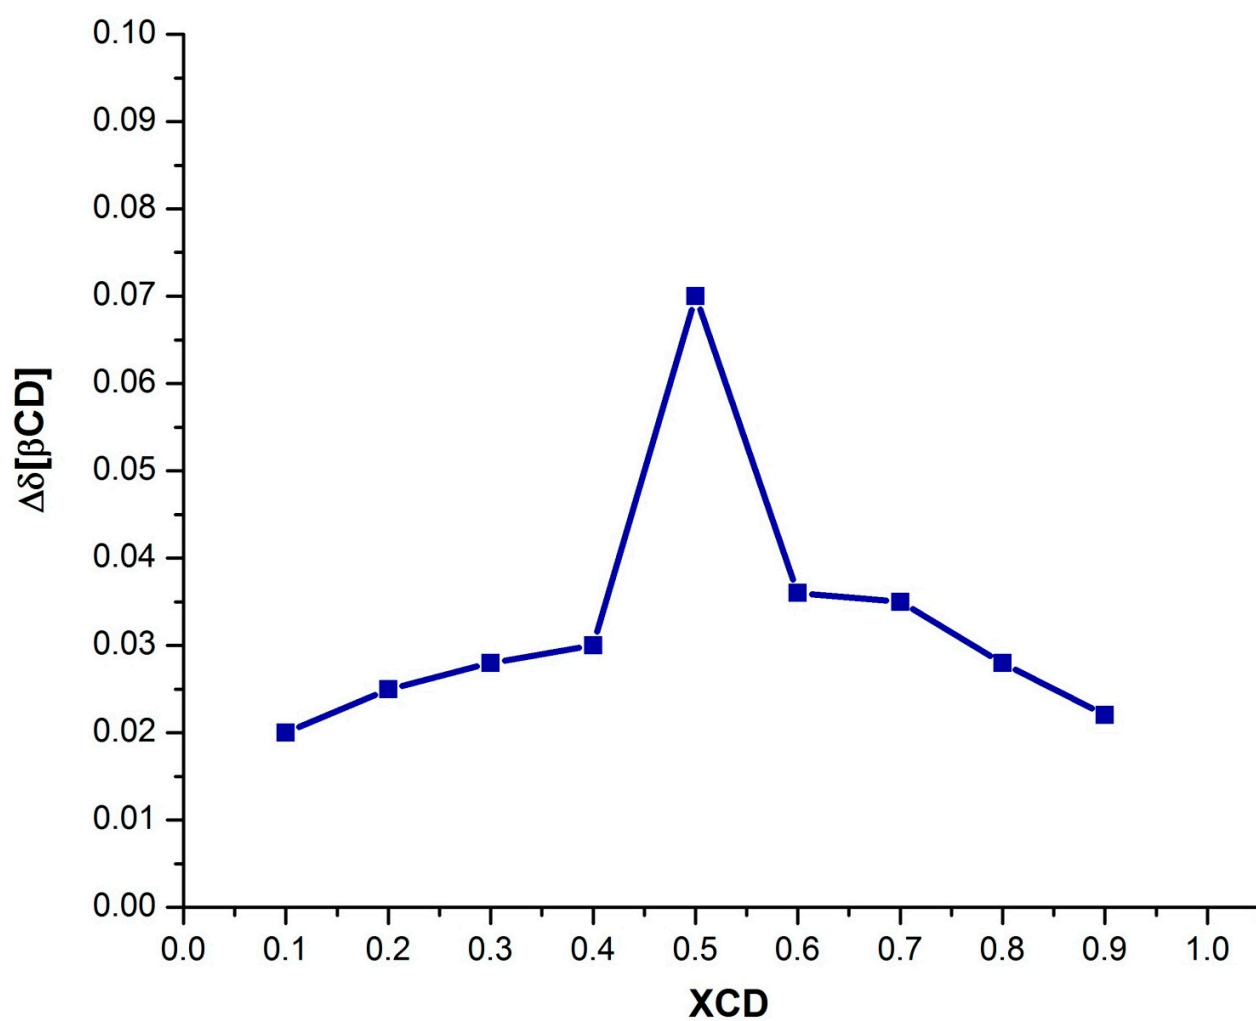

**Figure S9.** Job plot for the inclusion complex of AdCOOH with  $\beta$ CD cavities in the dendritic compound (**II**),  $[\beta\text{CD}] + [\text{AdCOOH}] = 3 \text{ mM}$  at 298 K, in  $\text{D}_2\text{O}$ . (The inflection point was found to be at 0.5, which confirms the stoichiometry 1:1).

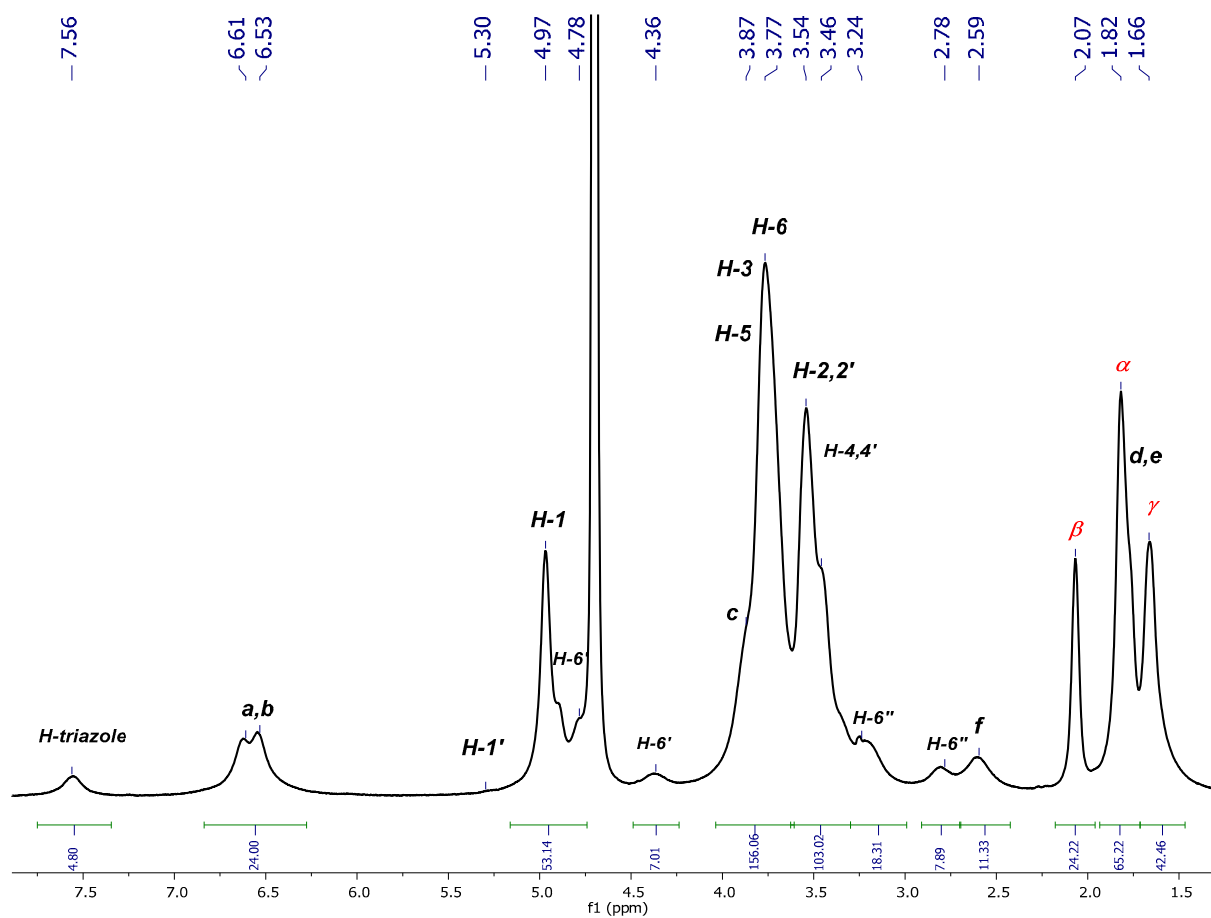

**Figure S10.**  $^1\text{H}$  NMR spectrum of inclusion complex  $\text{P}_3\text{N}_3\text{-[O-C}_6\text{H}_4\text{-O-(CH}_2\text{)}_4\text{-}\beta\text{CD]}_6$  (II)/AdCOOH in  $\text{D}_2\text{O}$ .

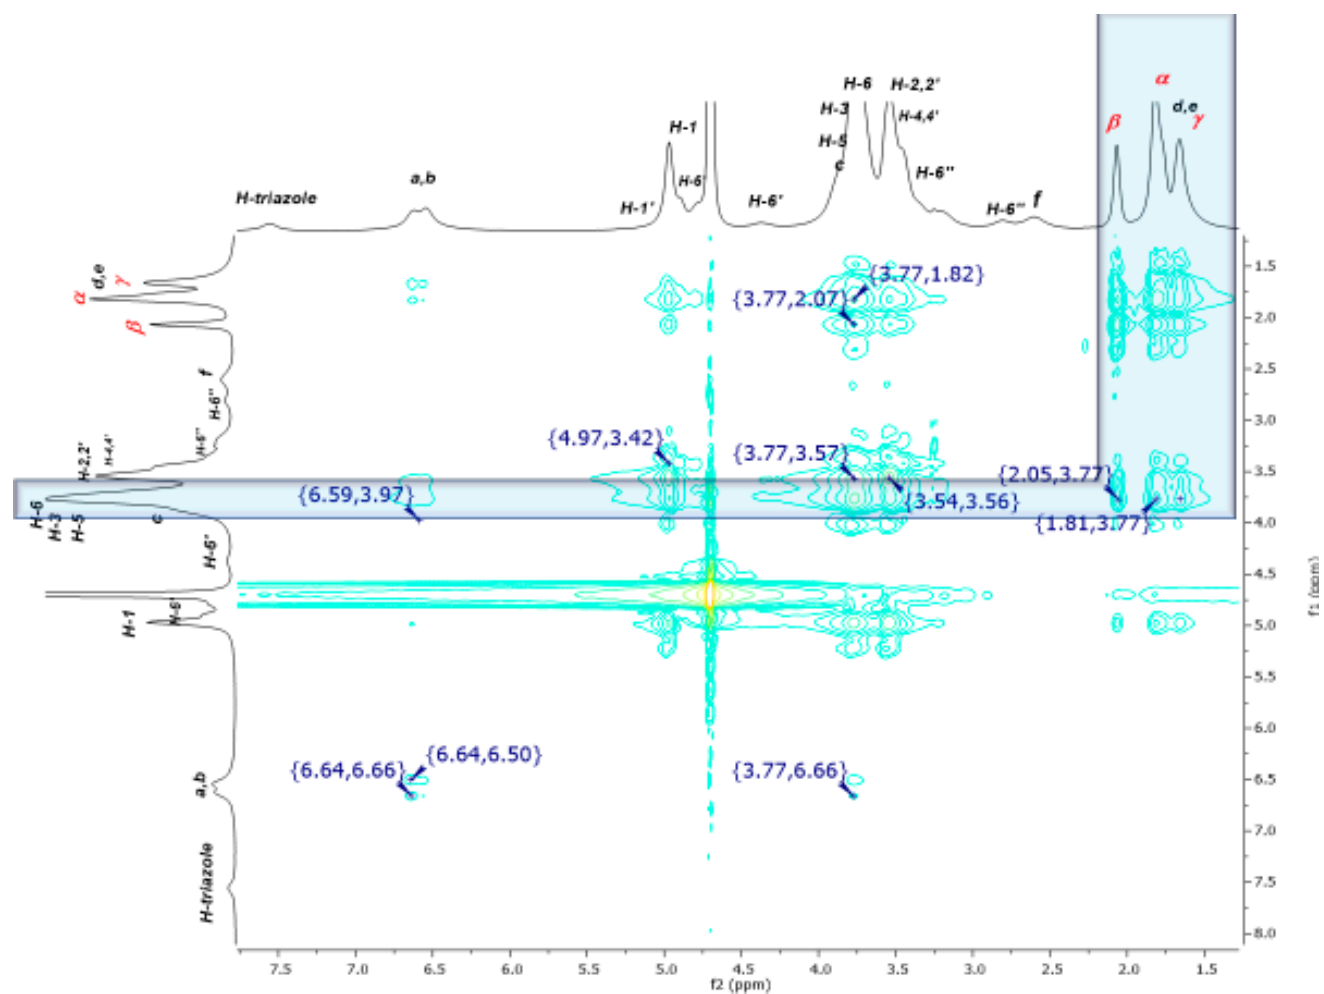

**Figure S11.** 2D NMR NOESY spectrum of inclusion complex  $P_3N_3$ -[O-C<sub>6</sub>H<sub>4</sub>-O-(CH<sub>2</sub>)<sub>4</sub>- $\beta$ CD]<sub>6</sub> (II)/AdCOOH in D<sub>2</sub>O.
